# Supplementary material for: Spatial Differentiation of Physical and Chemical Soil Parameters under Integrated, Organic, and Biodynamic Viticulture
Source: MDPI journal article supplement (doi:10.3390/plants9101361), 2020-10-14
Supplement: s1 [file s1]

## Supplementary Information

**Table S1.** Effects of management system on maximum height of the cover crop biomass and soil coverage [%] in 2019.

|                             | p management    | Integrated              | Organic                  | Biodynamic               |
|-----------------------------|-----------------|-------------------------|--------------------------|--------------------------|
| Cover crop height (cm)      | <b>4.86E-04</b> | 12.6 ± 5.1 <sup>b</sup> | 32.0 ± 22.0 <sup>a</sup> | 24.3 ± 21.4 <sup>a</sup> |
| Degree of soil coverage (%) | 0.053           | 83.8 ± 16.0             | 66.3 ± 33.3              | 65.8 ± 33.4              |

Maximum height of cover crop biomass and soil coverage in greened inter-row spaces were assessed throughout the growing season 2019 (06/03/2019, 07/10/2019, 08/24/2019) on 1 m<sup>2</sup> per management and field replicate which was chosen randomly.

Analyses of variance were calculated based on linear mixed models. Significant factor effects (with  $\alpha = 0.05$ ) are marked bold. Average values ± standard deviation are given per management system and different superscript letters indicate statistically significant differences among factor levels in case of a significant management effect.

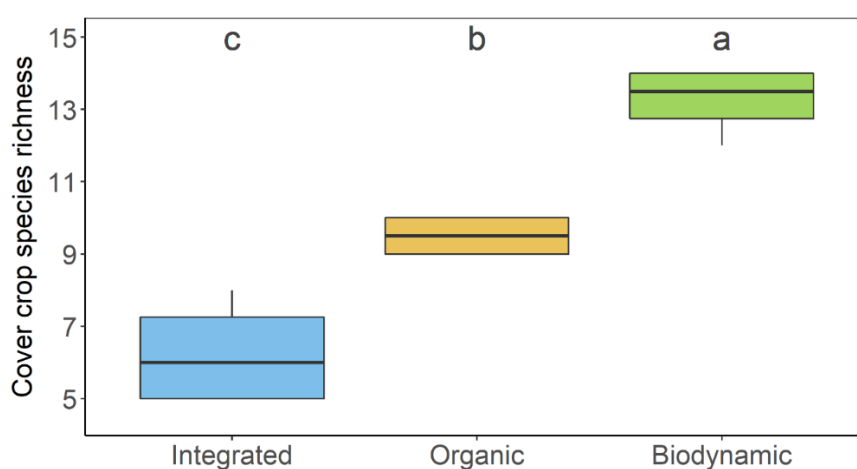

**Figure S1.** Biodiversity of cover crops in 2019 expressed as species richness.

Cover crop species in greened inter-row spaces were assessed throughout the growing season 2019 (06/03/2019, 07/10/2019, 08/24/2019) on 1 m<sup>2</sup> per field replicate which was randomly chosen. Species were identified according to Aichele and Golte-Bechtle [1], Hanf [2] and Licht [3].

Management systems with different letters on top differ significantly with  $\alpha = 0.05$  according to least significant difference test (n = 4).

## References

1. Aichele, D.; Golte-Bechtle, M. *Was blüht denn da? Wildwachsende Blütenpflanzen Mitteleuropas*; Franckh'sche Verlagshandlung, W. Keller & Co.: Stuttgart, Germany, 1990; ISBN 9783440037232.
2. Hanf, M. *Farbatlas der Wildkräuter und Unkräuter*; Eugen Ulmer Verlag GmbH & Co.: Stuttgart, Germany, 1998; ISBN 3800140748.
3. Licht, W. *Einführung in die Pflanzenbestimmung. Die wichtigsten Familien und ihre Merkmale*; Quelle & Meyer Verlag: Wiesbaden, Germany, 1995; ISBN 3494012334
